# Supplementary material
Source: PubMed Central journal article supplement (PMC8989521)
Supplement: gkac135_supplemental_file.pdf [file gkac135_supplemental_file.pdf]

## Supplementary Information

### **Cdc48<sup>Ufd1/Npl4</sup> segregase removes mislocalized centromeric histone H3 variant CENP-A from non-centromeric chromatin**

Kentaro Ohkuni<sup>1</sup>, Loran Gliford<sup>1</sup>, Wei-Chun Au<sup>1</sup>, Evelyn Suva<sup>1</sup>, Peter Kaiser<sup>2</sup>, and  
Munira A. Basrai<sup>1\*</sup>

<sup>1</sup>Genetics Branch, Center for Cancer Research, National Cancer Institute, National  
Institutes of Health, Bethesda, MD 20892

<sup>2</sup>Department of Biological Chemistry, School of Medicine, University of California,  
Irvine, CA 92697

#### **\*Corresponding Author:**

Munira A. Basrai

Genetics Branch, Center for Cancer Research, National Cancer Institute, National  
Institutes of Health, 41 Medlars Drive, Room B624, Bethesda, MD 20892

Email: [basrain@nih.gov](mailto:basrain@nih.gov)

Supplementary Tables S1-S3

Supplementary Figures S1-S20

**Table S1.** *S. cerevisiae* strains used in this study.

| Strains        | Parent/Source | Genotype                                                          | Reference  |
|----------------|---------------|-------------------------------------------------------------------|------------|
| PK1/YMB8853    |               | <i>MATa bar1Δ ura3Δns ade1 his2 leu2-3,112 trp1-1 ARG4</i>        | P. Kaiser  |
| PK1658/YMB9055 |               | <i>MATa cdc48-3</i>                                               | P. Kaiser  |
| PK1743/YMB9056 |               | <i>MATa ufd1-2</i>                                                | P. Kaiser  |
| PK1670/YMB9057 |               | <i>MATa npl4-1</i>                                                | P. Kaiser  |
| YMB10546       | PK1           | <i>MATa</i> [pYES2]                                               | This study |
| YMB10547       | PK1           | <i>MATa</i> [pMB1345]                                             | This study |
| YMB10549       | PK1658        | <i>MATa cdc48-3</i> [pYES2]                                       | This study |
| YMB10550       | PK1658        | <i>MATa cdc48-3</i> [pMB1345]                                     | This study |
| YMB10552       | PK1743        | <i>MATa ufd1-2</i> [pYES2]                                        | This study |
| YMB10553       | PK1743        | <i>MATa ufd1-2</i> [pMB1345]                                      | This study |
| YMB10555       | PK1670        | <i>MATa npl4-1</i> [pYES2]                                        | This study |
| YMB10556       | PK1670        | <i>MATa npl4-1</i> [pMB1345]                                      | This study |
| YMB10649       | YMB10550      | <i>MATa cdc48-3</i> [pMB1345] [pRS425]                            | This study |
| YMB10650       | YMB10550      | <i>MATa cdc48-3</i> [pMB1345] [pMB1897]                           | This study |
| YMB10651       | PK1           | <i>MATa cse4Δ::6His-3HA-CSE4::NatR</i>                            | This study |
| YMB10652       | PK1658        | <i>MATa cdc48-3 cse4Δ::6His-3HA-CSE4::NatR</i>                    | This study |
| YMB10653       | PK1743        | <i>MATa ufd1-2 cse4Δ::6His-3HA-CSE4::NatR</i>                     | This study |
| YMB10654       | PK1670        | <i>MATa npl4-1 cse4Δ::6His-3HA-CSE4::NatR</i>                     | This study |
| YMB11092       | YMB10652      | <i>MATa cdc48-3 psh1Δ::kanMX6 cse4Δ::6His-3HA-CSE4::NatR</i>      | This study |
| YMB11148       | YMB10652      | <i>MATa cdc48-3 slx5Δ::kanMX6 cse4Δ::6His-3HA-CSE4::NatR</i>      | This study |
| YMB11448       | PK1           | <i>MATa NPL4-Myc::kanMX6</i>                                      | This study |
| YMB11449       | YMB10651      | <i>MATa NPL4-Myc::kanMX6 cse4Δ::6His-3HA-CSE4::NatR</i>           | This study |
| YMB11450       | YMB10652      | <i>MATa NPL4-Myc::kanMX6 cse4Δ::6His-3HA-CSE4::NatR cdc48-3</i>   | This study |
| YMB11522       | YMB10651      | <i>MATa psh1Δ::kanMX6 cse4Δ::6His-3HA-CSE4::NatR</i>              | This study |
| YMB11457       | PK1658        | <i>MATa cdc48-3</i> [pYES2]                                       | This study |
| YMB11458       | PK1658        | <i>MATa cdc48-3</i> [pMB1345]                                     | This study |
| YMB11459       | PK1658        | <i>MATa cdc48-3</i> [pMB1768]                                     | This study |
| YMB11460       | PK1658        | <i>MATa cdc48-3</i> [pMB1766]                                     | This study |
| YMB11510       | YMB10654      | <i>MATa npl4-1 cse4Δ::6His-3HA-CSE4::NatR</i> [pMB1345] [pRS425]  | This study |
| YMB11511       | YMB10654      | <i>MATa npl4-1 cse4Δ::6His-3HA-CSE4::NatR</i> [pMB1345] [pMB1996] | This study |
| YMB11601       | PK1658        | <i>MATa cdc48-3 hhf1Δ::kanMX</i>                                  | This study |

|          |               |                                                                                                                                 |                 |
|----------|---------------|---------------------------------------------------------------------------------------------------------------------------------|-----------------|
| YMB11602 | PK1658        | <i>MATa cdc48-3 hhf2Δ::kanMX</i>                                                                                                | This study      |
| YMB11605 | YMB11601      | <i>MATa cdc48-3 hhf1Δ::kanMX</i> [pYES2]                                                                                        | This study      |
| YMB11606 | YMB11601      | <i>MATa cdc48-3 hhf1Δ::kanMX</i> [pMB1345]                                                                                      | This study      |
| YMB11607 | YMB11602      | <i>MATa cdc48-3 hhf2Δ::kanMX</i> [pYES2]                                                                                        | This study      |
| YMB11608 | YMB11602      | <i>MATa cdc48-3 hhf2Δ::kanMX</i> [pMB1345]                                                                                      | This study      |
| YMB11653 | PK1658        | <i>MATa cdc48-3</i> [pMB1787]                                                                                                   | This study      |
| YMB11619 | PK1658        | <i>MATa cdc48-3 cse4Δ::6His-3HA-cse4 Y193A::NatR</i>                                                                            | This study      |
| YMB11620 | PK1658        | <i>MATa cdc48-3 cse4Δ::6His-3HA-cse4 Y193F::NatR</i>                                                                            | This study      |
| YMB11628 | YMB11450      | <i>MATa NPL4-Myc::kanMX6 cse4Δ::6His-3HA-CSE4::NatR cdc48-3</i> [pMB433]                                                        | This study      |
| YMB11629 | YMB11450      | <i>MATa NPL4-Myc::kanMX6 cse4Δ::6His-3HA-CSE4::NatR cdc48-3</i> [pMB1458]                                                       | This study      |
| YMB11648 | YMB11450      | <i>MATa NPL4-Myc::kanMX6 cse4Δ::6His-3HA-CSE4::NatR cdc48-3 psh1Δ::hphMX</i>                                                    | This study      |
| YMB11665 | YMB11648      | <i>MATa NPL4-Myc::kanMX6 cse4Δ::6His-3HA-CSE4::NatR cdc48-3 psh1Δ::hphMX</i> [pMB1458]                                          | This study      |
| YMB11677 | PK1743        | <i>MATa ufd1-2</i> [pMB1345] [pRS425]                                                                                           | This study      |
| YMB11678 | PK1743        | <i>MATa ufd1-2</i> [pMB1345] [pMB2011]                                                                                          | This study      |
| YJW15    |               | <i>MATa ade2-1 ura3-1 his3-11,15 trp1-1 leu2-3,112 can1-100 ura3-1::ADH1-OsTIR1-9Myc (URA3)</i>                                 | (1)             |
| YMM203   |               | <i>MATa ade2-1 ura3-1 his3-11,15 trp1-1 leu2-3,112 can1-100 cdc48-aid (hphNT1) ura3-1::ADH1-OsTIR1-9Myc (URA3 &amp; klTRP1)</i> | (1)             |
| YMB11428 | YJW15         | <i>MATa cse4Δ::6His-3HA-CSE4::NatR</i>                                                                                          | This study      |
| YMB11429 | YMM203        | <i>MATa cse4Δ::6His-3HA-CSE4::NatR</i>                                                                                          | This study      |
| BY4741   |               | <i>MATa his3Δ1 leu2Δ0 met15Δ0 ura3Δ0</i>                                                                                        | Open Biosystems |
| BY4742   |               | <i>MATa his3Δ1 leu2Δ0 lys2Δ0 ura3Δ0</i>                                                                                         | Open Biosystems |
| YMB8734  | BY4742        | <i>MATa cdc48-1::NatR</i> (9 mutations)                                                                                         | Charles Boone   |
| YMB8735  | BY4741        | <i>MATa cdc48-1::kanMX6</i> (3 mutations)                                                                                       | Charles Boone   |
| YMB8736  | BY4741        | <i>MATa cdc48-4601::kanMX6</i>                                                                                                  | Charles Boone   |
| YMB9673  | BY4741/BY4742 | <i>MATa cse4Δ::6His-3HA-CSE4::NatR</i>                                                                                          | (2)             |
| YMB9470  | BY4741/BY4742 | <i>MATa cse4Δ::kanMX6</i> [pMB1725]                                                                                             | (3)             |
| YMB9887  | BY4741/BY4742 | <i>MATa cse4Δ::kanMX6</i> [pMB1781]                                                                                             | This study      |
| YMB9888  | BY4741/BY4742 | <i>MATa cse4Δ::kanMX6</i> [pMB1782]                                                                                             | This study      |
| YMB10904 | BY4741        | <i>MATa cdc48-3::kanMX6</i>                                                                                                     | Charles Boone   |
| YMB11204 | YMB10904      | <i>MATa cdc48-3::kanMX6 cse4Δ::6His-3HA-CSE4::NatR</i>                                                                          | This study      |

**Table S2.** Plasmids used in this study.

| Plasmid | Relevant characteristics                                          | Reference   |
|---------|-------------------------------------------------------------------|-------------|
| pYES2   | Vector ( <i>pGAL</i> , $2\mu$ , <i>URA3</i> )                     | (4)         |
| pMB433  | Vector ( <i>p426-pGAL1</i> , $2\mu$ , <i>URA3</i> )               | (5)         |
| pRS415  | Vector ( <i>CEN</i> , <i>LEU2</i> )                               | (6)         |
| pRS416  | Vector ( <i>CEN</i> , <i>URA3</i> )                               | (6)         |
| pRS425  | Vector ( $2\mu$ , <i>LEU2</i> )                                   | (7)         |
| pMB1345 | <i>pYES2-pGAL-8His-HA-CSE4</i> ( $2\mu$ , <i>URA3</i> )           | (8)         |
| pMB1458 | <i>pMB433-pGAL-6His-3HA-CSE4</i> ( $2\mu$ , <i>URA3</i> )         | (9)         |
| pMB1551 | MoBY Vector ( $2\mu$ , <i>LEU2</i> )                              | (10)        |
| pMB1604 | MoBY <i>UBI4</i> ( $2\mu$ , <i>LEU2</i> )                         | (10)        |
| pMB1725 | <i>pRS415-6His-3HA-CSE4</i> ( <i>CEN</i> , <i>LEU2</i> )          | (3)         |
| pMB1766 | <i>pYES2-pGAL-8His-HA-cse4 Y193A</i> ( $2\mu$ , <i>URA3</i> )     | (11)        |
| pMB1768 | <i>pYES2-pGAL-8His-HA-cse4 K215/216R</i> ( $2\mu$ , <i>URA3</i> ) | (12)        |
| pMB1787 | <i>pYES2-pGAL-8His-HA-cse4 Y193F</i> ( $2\mu$ , <i>URA3</i> )     | (11)        |
| pMB1781 | <i>pRS415-6His-3HA-cse4 Y193A</i> ( <i>CEN</i> , <i>LEU2</i> )    | This study  |
| pMB1782 | <i>pRS415-6His-3HA-cse4 Y193F</i> ( <i>CEN</i> , <i>LEU2</i> )    | This study  |
| pMB1897 | MoBY <i>CDC48</i> ( $2\mu$ , <i>LEU2</i> )                        | This study  |
| pMB1996 | MoBY <i>NPL4</i> ( $2\mu$ , <i>LEU2</i> )                         | This study  |
| pMB2011 | MoBY <i>UFD1</i> ( $2\mu$ , <i>LEU2</i> )                         | This study  |
| pLG41   | <i>pGAL-H3</i> ( <i>GAL1/10-HHT1</i> , $2\mu$ , <i>URA3</i> )     | M. M. Smith |
| pLG39   | <i>pGAL-H4</i> ( <i>GAL1/10-HHF1</i> , $2\mu$ , <i>URA3</i> )     | M. M. Smith |

**Table S3.** Primers used in this study.

| Primers        | Description                  | Sequence                | Reference |
|----------------|------------------------------|-------------------------|-----------|
| OMB244/OMB1690 | <i>CEN3</i> forward          | GATCAGCGCCAAACAATATGG   | (13)      |
| OMB245/OMB1691 | <i>CEN3</i> reverse          | AACTTCCACCAGTAAACGTTTC  | (13)      |
| OMB1692        | <i>periCEN3</i> R1 forward   | TTTACTGGTGGAAGTTTTGCTCA | (13)      |
| OMB1693        | <i>periCEN3</i> R1 reverse   | GTCAACGAGTCCTCTCTGGCTA  | (13)      |
| OMB2824/SB3735 | <i>SAP4</i> promoter forward | ACAGCACAACACGCTTACCA    | (14)      |
| OMB2825/SB3736 | <i>SAP4</i> promoter reverse | CCAGCCCTAAATCCCCTAAA    | (14)      |
| OMB2826/SB4768 | <i>RDS1</i> promoter forward | GACCCGTGCAGATCACTATTACA | (14)      |
| OMB2827/SB4769 | <i>RDS1</i> promoter reverse | GCAGTTTATCACATTTCCGTTTG | (14)      |

## References

1. Maric, M., Maculins, T., De Piccoli, G. and Labib, K. (2014) Cdc48 and a ubiquitin ligase drive disassembly of the CMG helicase at the end of DNA replication. *Science*, **346**, 1253-1256.
2. Au, W.C., Zhang, T., Mishra, P.K., Eisenstatt, J.R., Walker, R.L., Ocampo, J., Dawson, A., Warren, J., Costanzo, M., Baryshnikova, A. *et al.* (2020) Skp, Cullin, F-box (SCF)-Met30 and SCF-Cdc4-Mediated Proteolysis of CENP-A Prevents Mislocalization of CENP-A for Chromosomal Stability in Budding Yeast. *PLoS Genet*, **16**, e1008597.
3. Ohkuni, K., Levy-Myers, R., Warren, J., Au, W.C., Takahashi, Y., Baker, R.E. and Basrai, M.A. (2018) N-terminal Sumoylation of Centromeric Histone H3 Variant Cse4 Regulates Its Proteolysis To Prevent Mislocalization to Non-centromeric Chromatin. *G3 (Bethesda)*, **8**, 1215-1223.
4. Boeckmann, L., Takahashi, Y., Au, W.C., Mishra, P.K., Choy, J.S., Dawson, A.R., Szeto, M.Y., Waybright, T.J., Heger, C., McAndrew, C. *et al.* (2013) Phosphorylation of centromeric histone H3 variant regulates chromosome segregation in *Saccharomyces cerevisiae*. *Mol Biol Cell*, **24**, 2034-2044.
5. Mumberg, D., Muller, R. and Funk, M. (1994) Regulatable promoters of *Saccharomyces cerevisiae*: comparison of transcriptional activity and their use for heterologous expression. *Nucleic Acids Res*, **22**, 5767-5768.
6. Sikorski, R.S. and Hieter, P. (1989) A system of shuttle vectors and yeast host strains designed for efficient manipulation of DNA in *Saccharomyces cerevisiae*. *Genetics*, **122**, 19-27.
7. Christianson, T.W., Sikorski, R.S., Dante, M., Shero, J.H. and Hieter, P. (1992) Multifunctional yeast high-copy-number shuttle vectors. *Gene*, **110**, 119-122.
8. Ohkuni, K., Takahashi, Y., Fulp, A., Lawrimore, J., Au, W.C., Pasupala, N., Levy-Myers, R., Warren, J., Strunnikov, A., Baker, R.E. *et al.* (2016) SUMO-Targeted Ubiquitin Ligase (STUbL) Slx5 regulates proteolysis of centromeric histone H3 variant Cse4 and prevents its mislocalization to euchromatin. *Mol Biol Cell*.
9. Au, W.C., Dawson, A.R., Rawson, D.W., Taylor, S.B., Baker, R.E. and Basrai, M.A. (2013) A Novel Role of the N-Terminus of Budding Yeast Histone H3 Variant Cse4 in Ubiquitin-Mediated Proteolysis. *Genetics*, **194**, 513-518.
10. Ho, C.H., Magtanong, L., Barker, S.L., Gresham, D., Nishimura, S., Natarajan, P., Koh, J.L.Y., Porter, J., Gray, C.A., Andersen, R.J. *et al.* (2009) A molecular barcoded yeast ORF library enables mode-of-action analysis of bioactive compounds. *Nat Biotechnol*, **27**, 369-377.
11. Eisenstatt, J.R., Ohkuni, K., Au, W.C., Preston, O., Gliford, L., Suva, E., Costanzo, M., Boone, C. and Basrai, M.A. (2021) Reduced gene dosage of histone H4 prevents CENP-A mislocalization and chromosomal instability in *Saccharomyces cerevisiae*. *Genetics*, **218**.
12. Ohkuni, K., Suva, E., Au, W.C., Walker, R.L., Levy-Myers, R., Meltzer, P.S., Baker, R.E. and Basrai, M.A. (2020) Deposition of Centromeric Histone H3

- Variant CENP-A/Cse4 into Chromatin Is Facilitated by Its C-Terminal Sumoylation. *Genetics*, **214**, 839-854.
13. Choy, J.S., Acuna, R., Au, W.C. and Basrai, M.A. (2011) A role for histone H4K16 hypoacetylation in *Saccharomyces cerevisiae* kinetochore function. *Genetics*, **189**, 11-21.
  14. Hildebrand, E.M. and Biggins, S. (2016) Regulation of Budding Yeast CENP-A levels Prevents Misincorporation at Promoter Nucleosomes and Transcriptional Defects. *PLoS Genet*, **12**, e1005930.

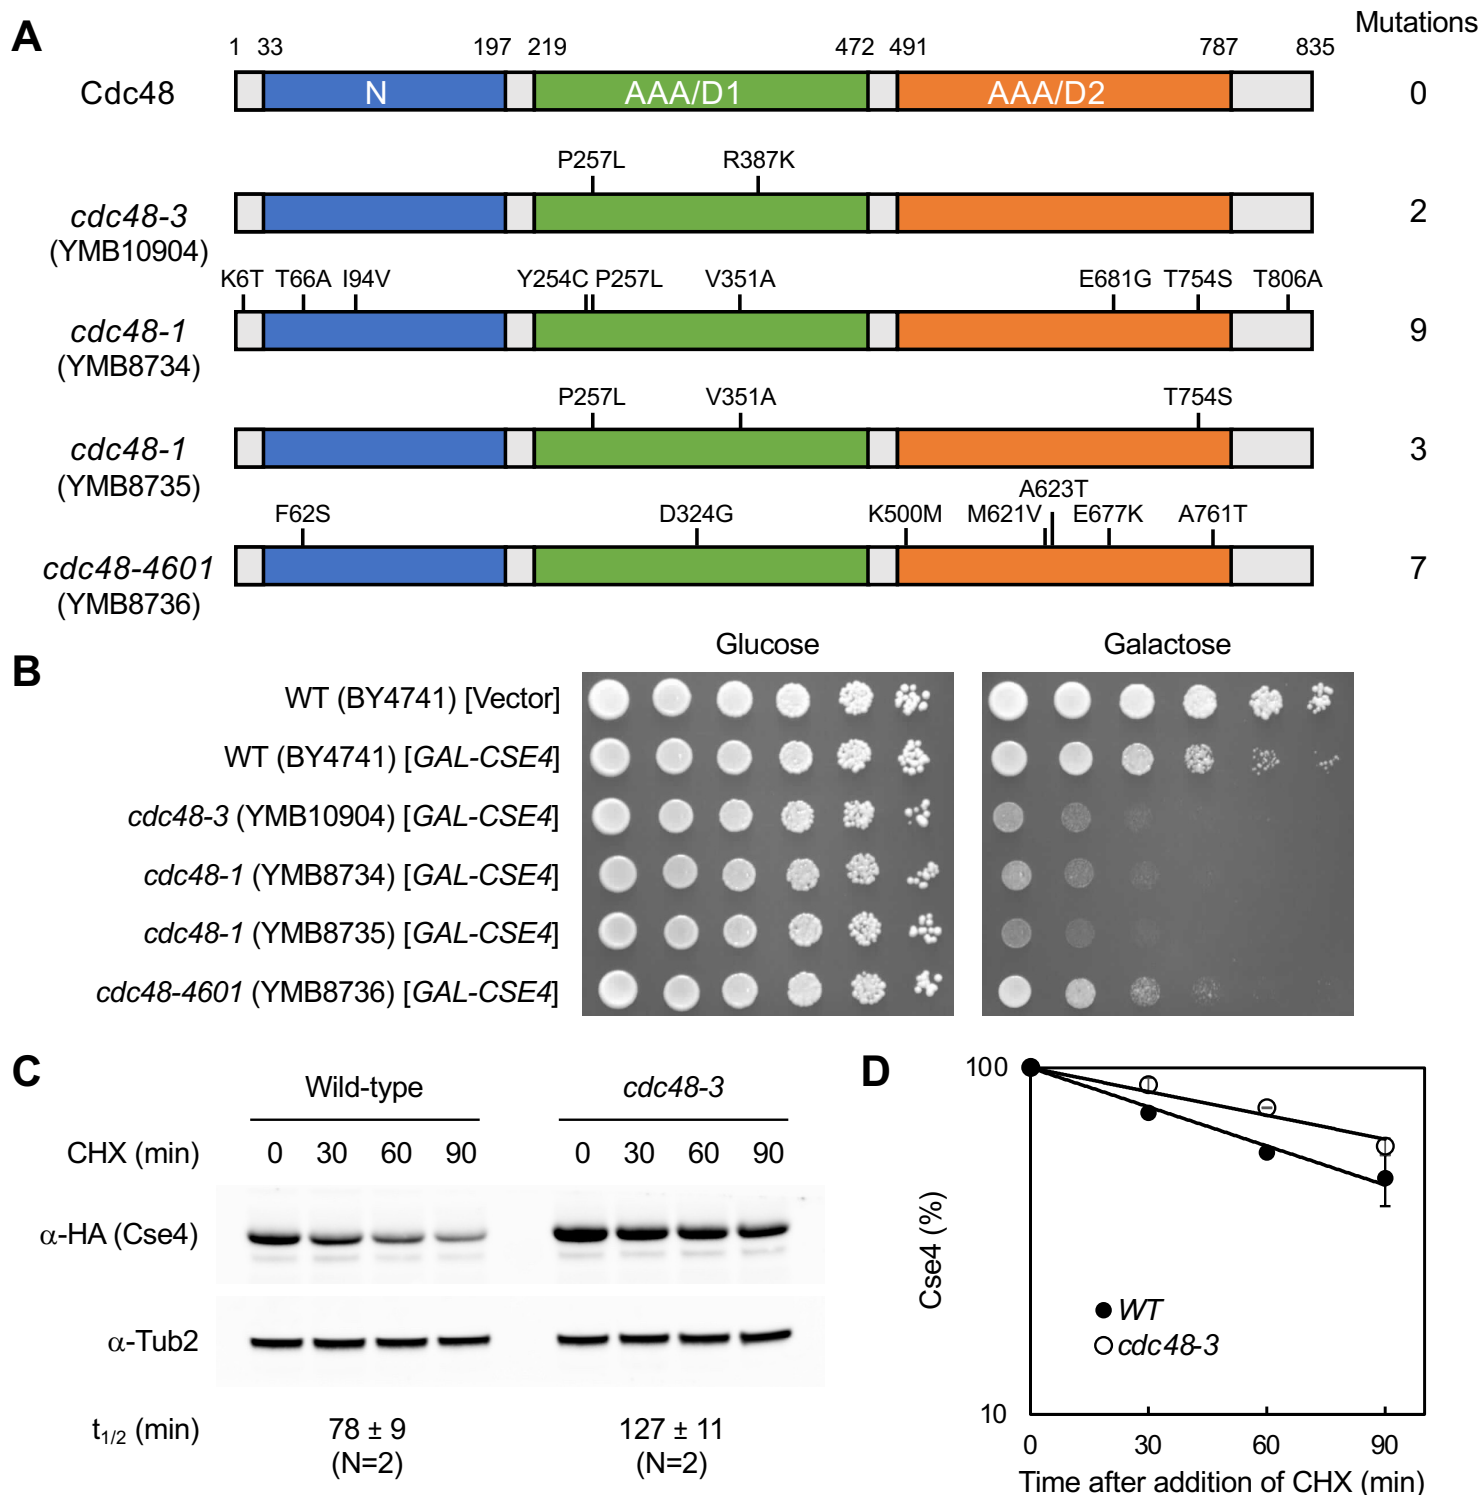

**Supplementary Figure S1.** The SGA screen identified *GAL-CSE4* SDL in *cdc48-3* mutant. (A) Sequence analysis of various *cdc48* mutants. The N, D1, and D2 domains of Cdc48 are blue, green, and orange, respectively. (B) Overexpression of *CSE4* results in SDL in *cdc48* mutants. The indicated strains transformed with vector (pYES2) or *GAL-CSE4* (pMB1345) were spotted in five-fold serial dilutions on glucose (2%)- or galactose (2%)-containing synthetic medium selective for the plasmids. The plates were incubated at 25°C for 3 days. (C) Endogenous Cse4 is stabilized in *cdc48-3* mutant. Protein extracts from wild-type (YMB9673) or *cdc48-3* (YMB11204) strain were prepared using logarithmically growing cells in YPD, treated with cycloheximide (CHX, 50 µg/ml) for various time points. Blots were probed with anti-HA (Cse4) or anti-Tub2 (loading control) antibody. Cse4 protein half-life ( $t_{1/2}$ ) represents the mean of two biological repeats with average deviation. (D) Kinetics of turnover from C. Error bars indicate average deviation from the mean.



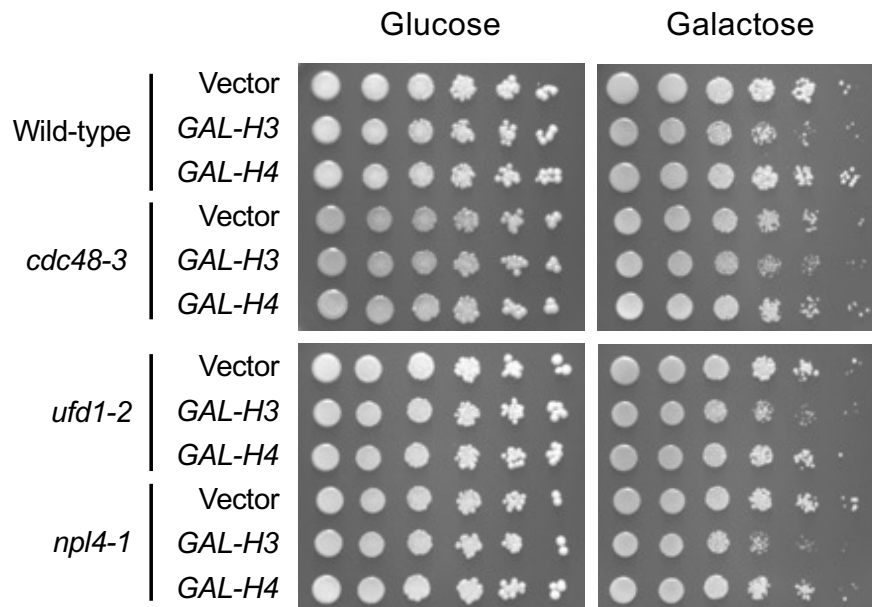

**Supplementary Figure S2.** Overexpression of histone H3 or H4 does not cause a growth defect in *cdc48-3*, *ufd1-2*, and *npl4-1* strains. Wild-type (PK1), *cdc48-3* (PK1658), *ufd1-2* (PK1743), and *npl4-1* (PK1670) cells containing either vector (pMB433), *GAL-H3* (pLG41), or *GAL-H4* (pLG39) were spotted in five-fold serial dilutions on glucose (2%)- or galactose (2%)-containing synthetic medium selective for the plasmid. The plates were incubated at 25°C for 4 days.

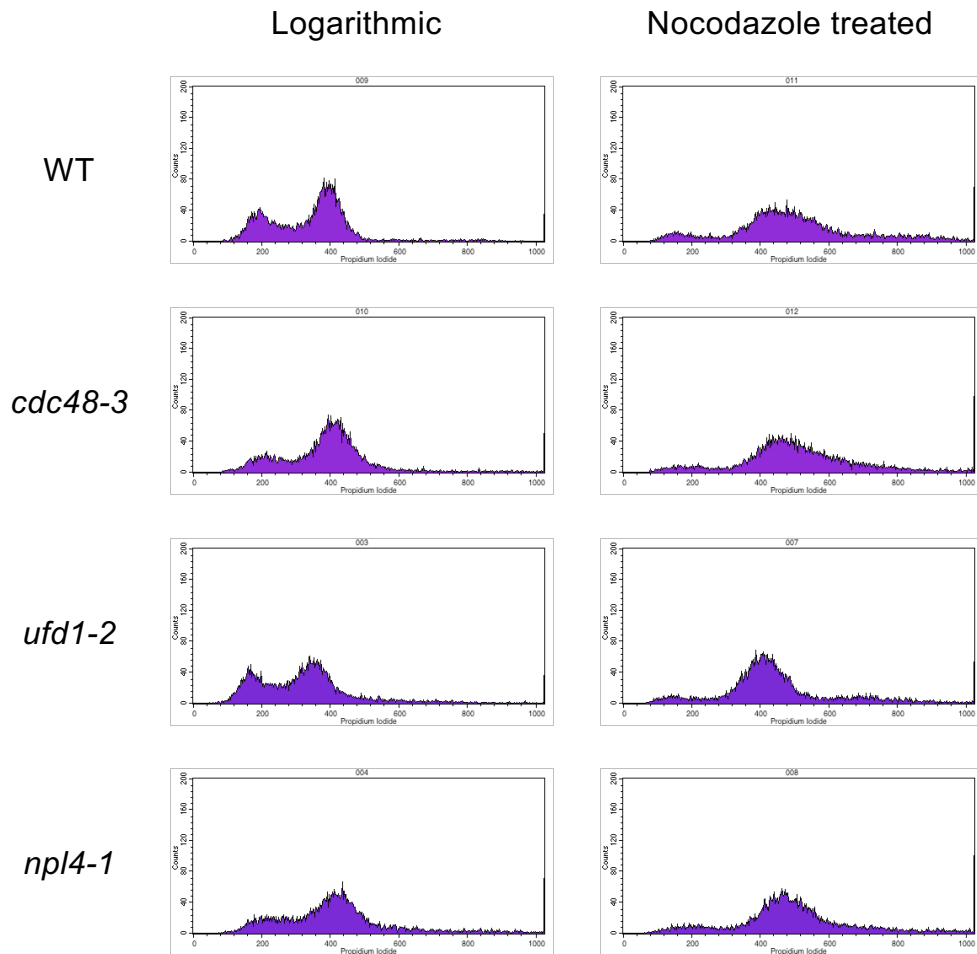

**Supplementary Figure S3.** FACS profiles used in Figure 1C for chromosome spreads with nocodazole arrested cells. Cells grown to logarithmic phase or arrested with nocodazole were processed by flow cytometry.

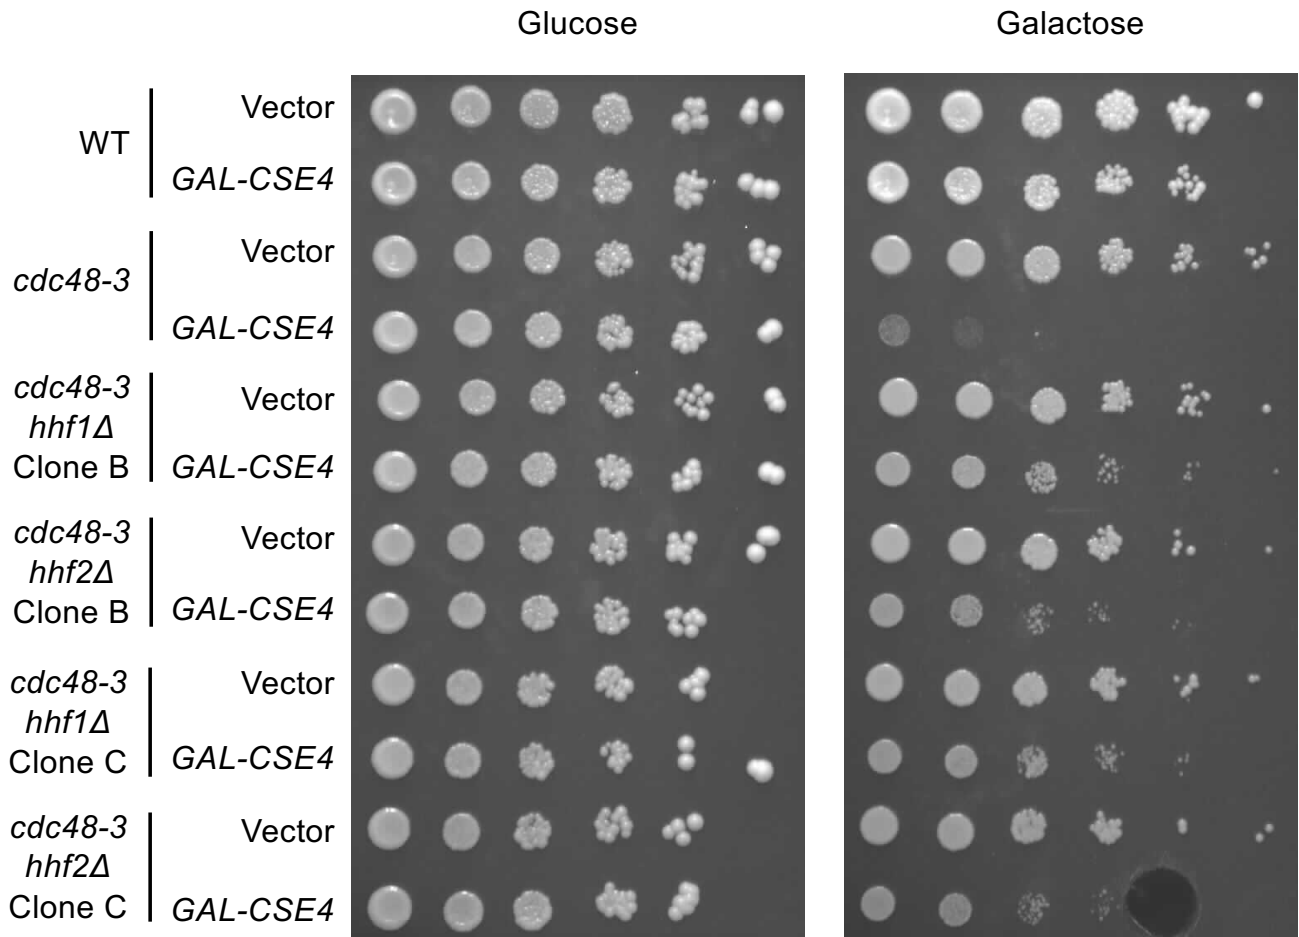

**Supplementary Figure S4.** Reduced dosage of histone H4 (*hhf1Δ* or *hhf2Δ*) suppresses the *cdc48-3* GAL-CSE4 SDL. Biological repeats for the growth assay shown in Figure 2A. The plates were incubated at 25°C for 5 days.

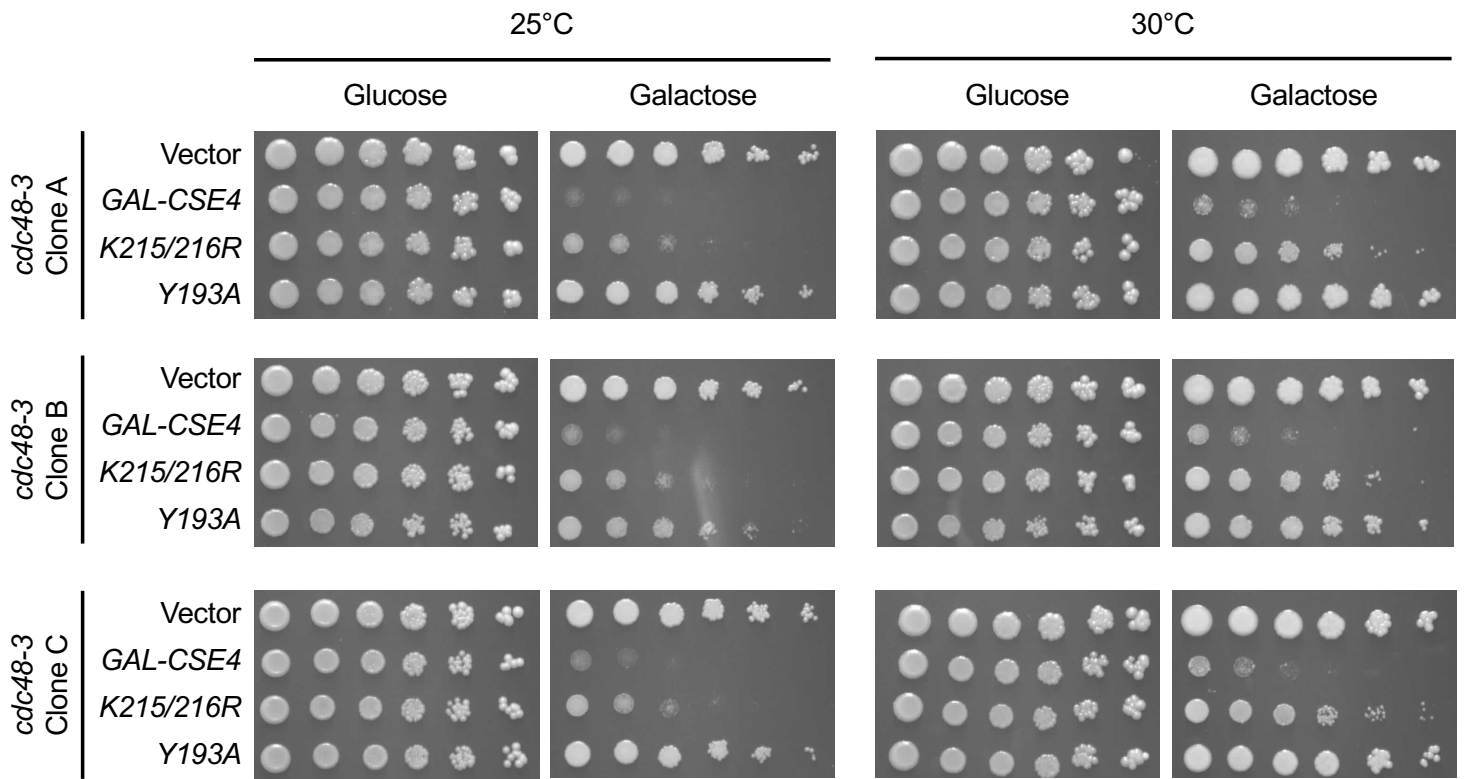

**Supplementary Figure S5.** *cse4 K215/216R* and *cse4 Y193A* mutations suppress *cdc48-3 GAL-CSE4* SDL. Biological repeats for the growth assay shown in Figures 2B and 4B. The plates were incubated at 25°C or 30°C for 5 days.

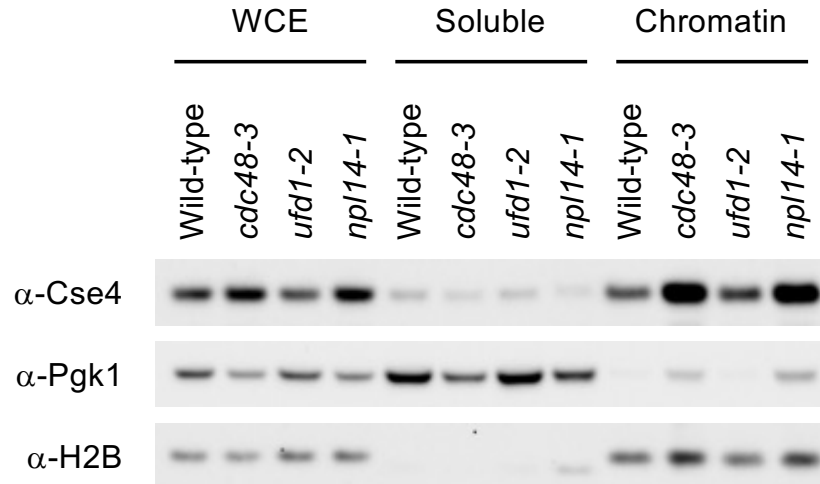

**Supplementary Figure S6.** Chromatin-bound endogenous Cse4 is enriched in *cdc48-3* and *np14-1* strains. Biological repeats shown in Figure 2C. Whole cell extracts (WCEs) prepared from equal numbers of logarithmically growing cells in YPD were fractionated into soluble and chromatin fractions. Cse4 levels in each fraction were monitored by Western blot analysis with anti-Cse4 antibody. Pgk1 and histone H2B were used as markers for soluble and chromatin fractions, respectively.

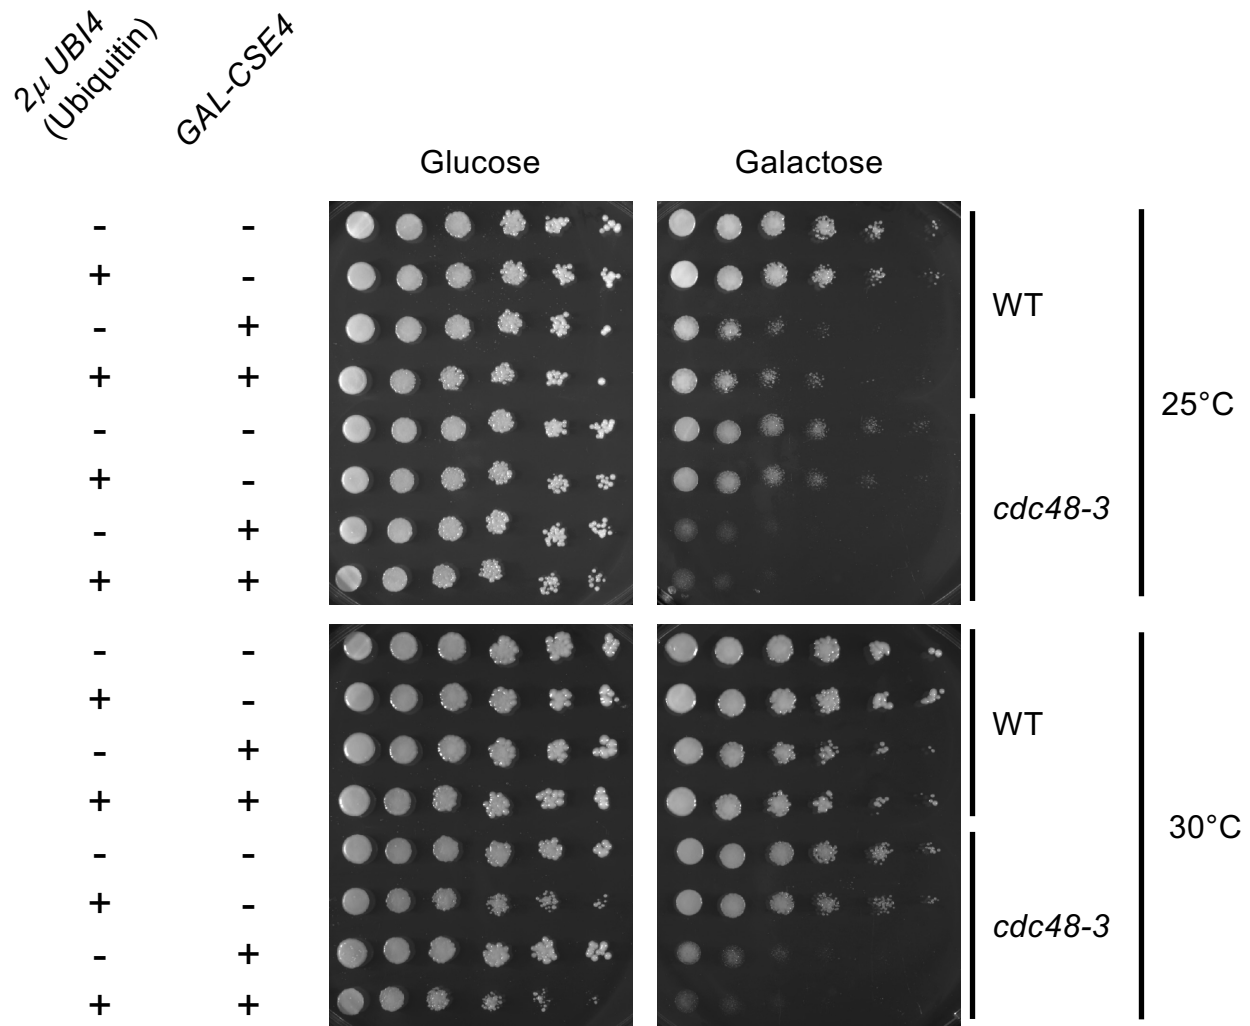

**Supplementary Figure S7.** Overexpression of *UBI4* does not suppress the SDL of a *cdc48-3* GAL-*CSE4* strain. Wild-type (PK1) and *cdc48-3* (PK1658) strains transformed with vector (pYES2) or GAL-*CSE4* (pMB1345) and subsequently transformed with empty vector (pMB1551) or 2 $\mu$  *UBI4* (pMB1604) were spotted in five-fold serial dilutions on glucose (2%)- or galactose (2%)-containing synthetic medium selective for the plasmids. The plates were incubated at 25°C or 30°C for 3 days.

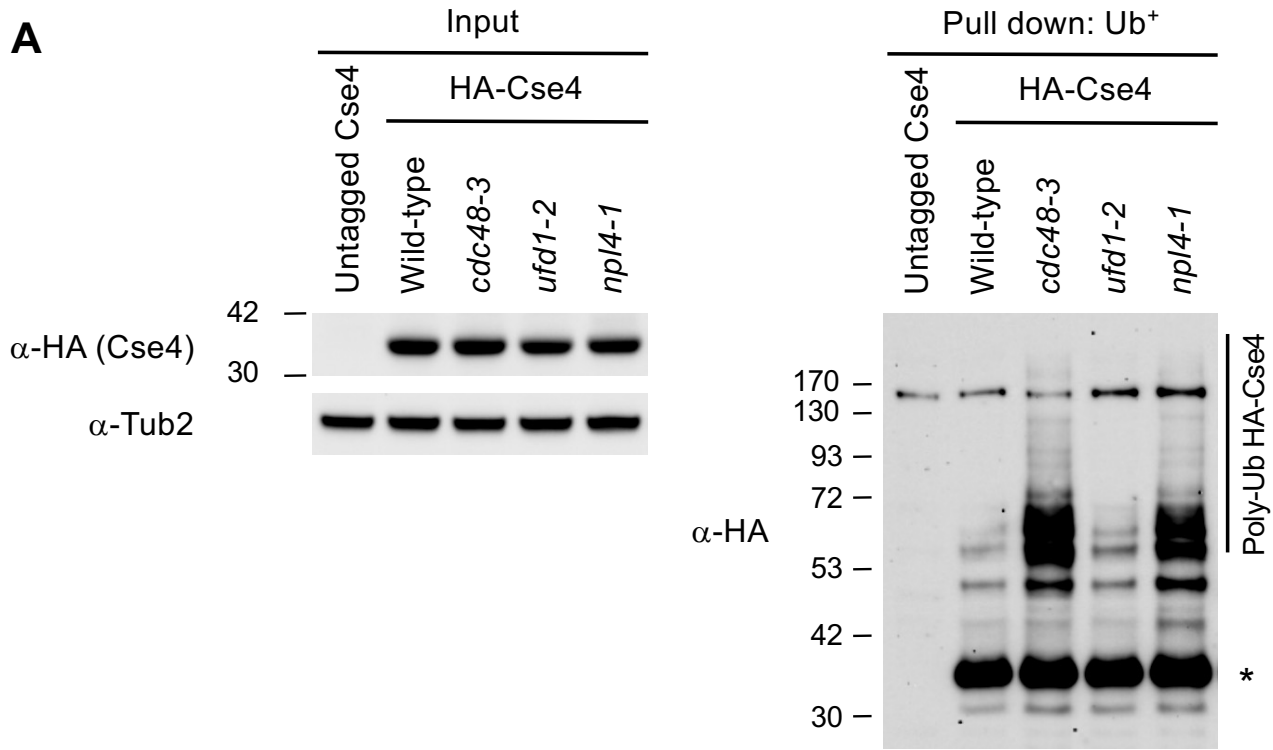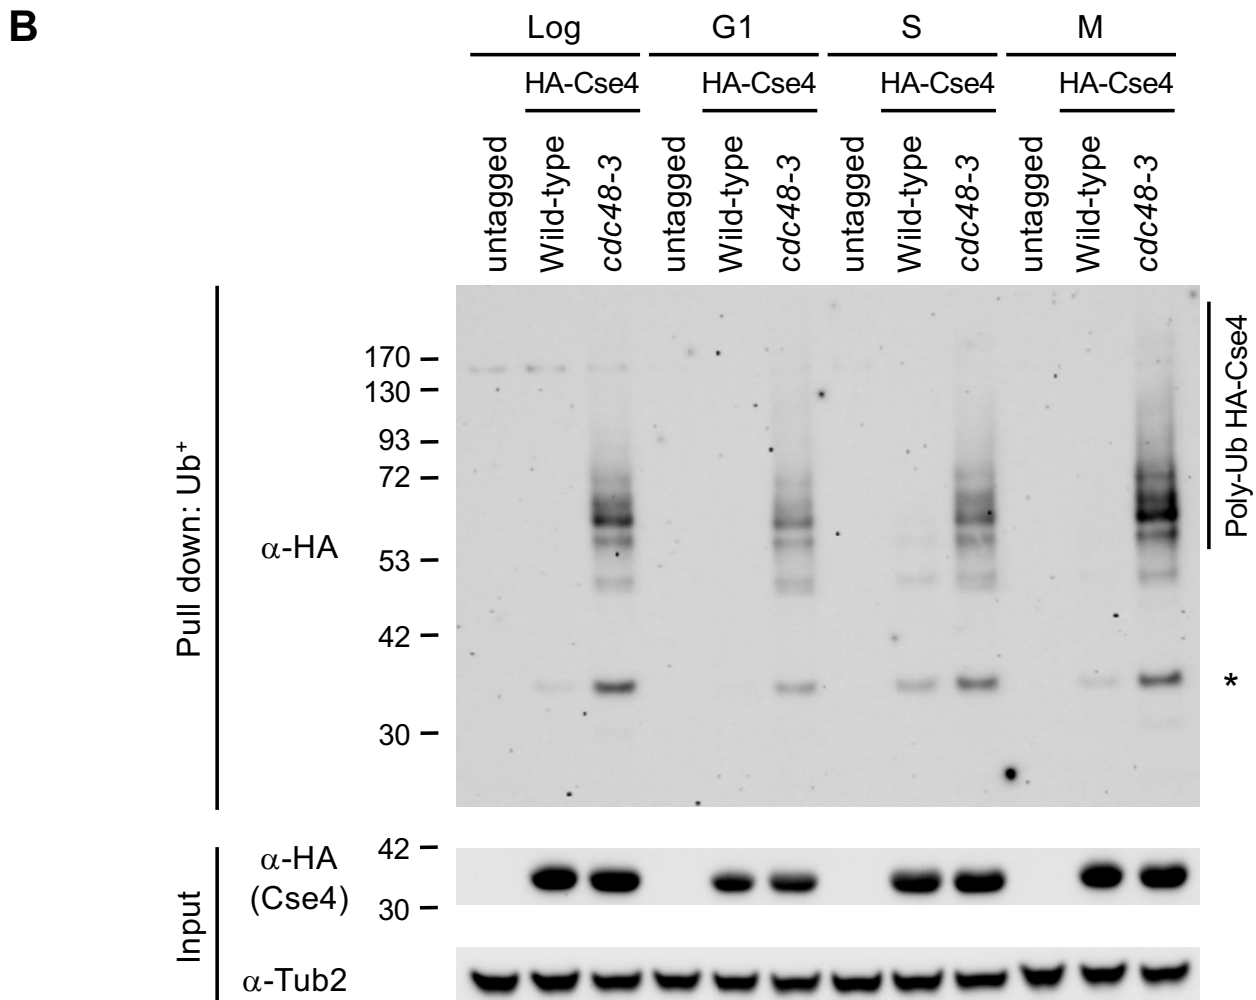

**Supplementary Figure S8.** Polyubiquitinated Cse4 is enriched in *cdc48-3*, *ufd1-2*, and *npl4-1* mutants under normal physiological conditions. Biological repeats for the Ub pull down assay shown in Figure 3A. Asterisk shows nonmodified Cse4. (A) Levels of Cse4 polyubiquitination are enhanced in *cdc48-3*, *ufd1-2*, and *npl4-1* strains. (B) Higher levels of Cse4 polyubiquitination are not specific to any cell cycle stage in *cdc48-3* mutants.

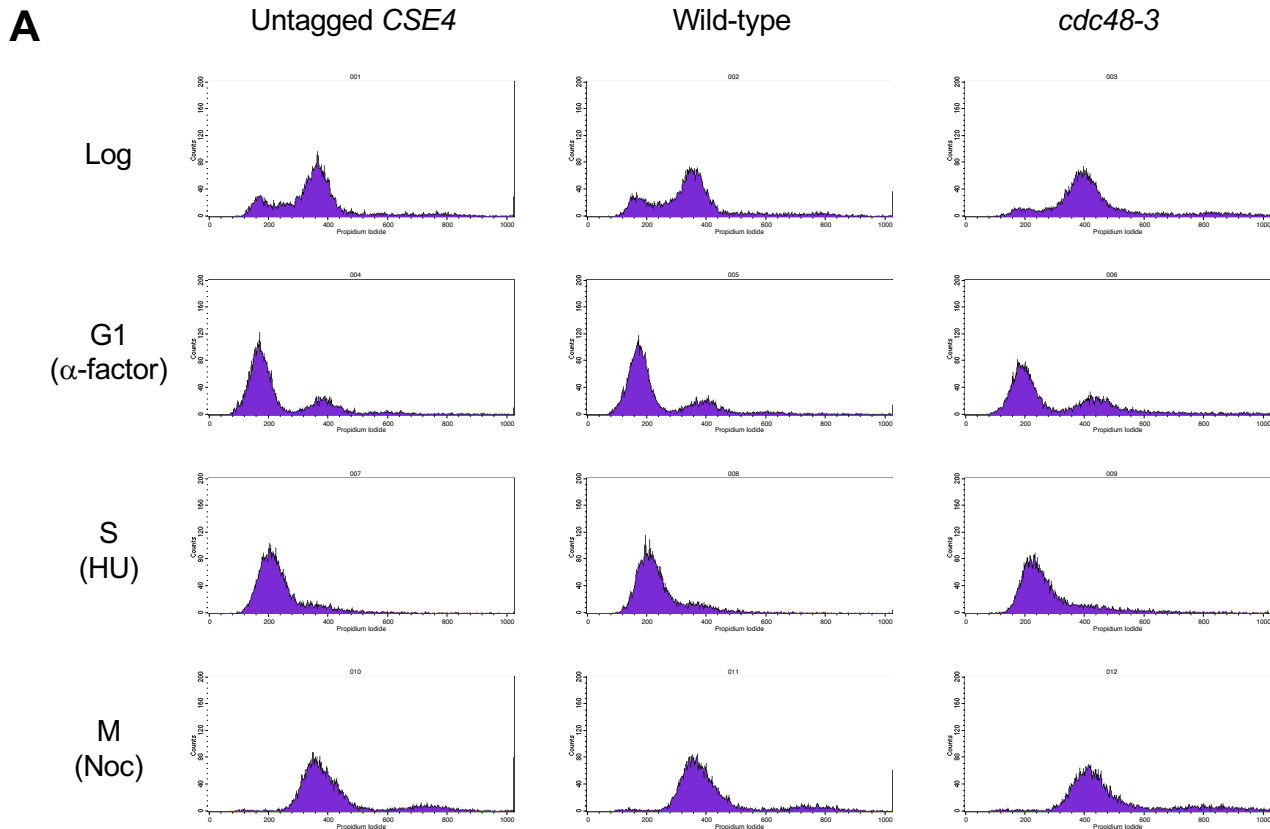

**B**

| Strain               | Cell cycle             | G1             | S              | M              | A             | T              |
|----------------------|------------------------|----------------|----------------|----------------|---------------|----------------|
| Untagged <i>CSE4</i> | LOG                    | 19             | 28             | 13             | 2             | 38             |
| Wild-type            | LOG                    | 20.5 $\pm$ 0.5 | 35.0 $\pm$ 2.0 | 5.0 $\pm$ 2.0  | 5.0 $\pm$ 2.0 | 34.5 $\pm$ 1.5 |
| <i>cdc48-3</i>       | LOG                    | 14.0 $\pm$ 2.0 | 39.0 $\pm$ 4.0 | 5.5 $\pm$ 2.5  | 7.5 $\pm$ 0.5 | 34.0 $\pm$ 0.0 |
| Untagged <i>CSE4</i> | G1 ( $\alpha$ -factor) | 90             | 2              | 0              | 0             | 8              |
| Wild-type            | G1 ( $\alpha$ -factor) | 90.5 $\pm$ 1.5 | 0              | 0.5 $\pm$ 0.5  | 1.0 $\pm$ 1.0 | 8.0 $\pm$ 0.0  |
| <i>cdc48-3</i>       | G1 ( $\alpha$ -factor) | 84.0 $\pm$ 1.0 | 5.5 $\pm$ 4.5  | 0              | 1.5 $\pm$ 0.5 | 9.0 $\pm$ 3.0  |
| untagged <i>CSE4</i> | S (HU)                 | 2              | 72             | 10             | 4             | 12             |
| Wild-type            | S (HU)                 | 2.5 $\pm$ 0.5  | 77.0 $\pm$ 1.0 | 6.0 $\pm$ 6.0  | 7.5 $\pm$ 1.5 | 7.0 $\pm$ 3.0  |
| <i>cdc48-3</i>       | S (HU)                 | 2.0 $\pm$ 0.0  | 80.5 $\pm$ 2.5 | 5.5 $\pm$ 2.5  | 5.5 $\pm$ 2.5 | 6.5 $\pm$ 2.5  |
| Untagged <i>CSE4</i> | G2/M (Nocodazole)      | 0              | 11             | 88             | 1             | 0              |
| Wild-type            | G2/M (Nocodazole)      | 1.5 $\pm$ 0.5  | 18.0 $\pm$ 2.0 | 73.5 $\pm$ 2.5 | 5.0 $\pm$ 2.0 | 2.0 $\pm$ 2.0  |
| <i>cdc48-3</i>       | G2/M (Nocodazole)      | 1.5 $\pm$ 0.5  | 23.5 $\pm$ 2.5 | 66.0 $\pm$ 1.0 | 6.0 $\pm$ 2.0 | 3.0 $\pm$ 0.0  |

**Supplementary Figure S9.** Cell cycle profiles of untagged *CSE4*, wild-type, and *cdc48-3* strains grown to logarithmic phase or arrested with  $\alpha$ -factor, HU, or nocodazole (Noc). (A) FACS analysis used in Supplementary Figure S8B. (B) Nuclear morphology was used to determine the percentage of cells that show unbudded (G1), small budded (S), and large budded (M) arrest phenotype of cells used in Figure 3A and Supplementary Figure S8B. 100 cells were counted for each strain for each arrest.



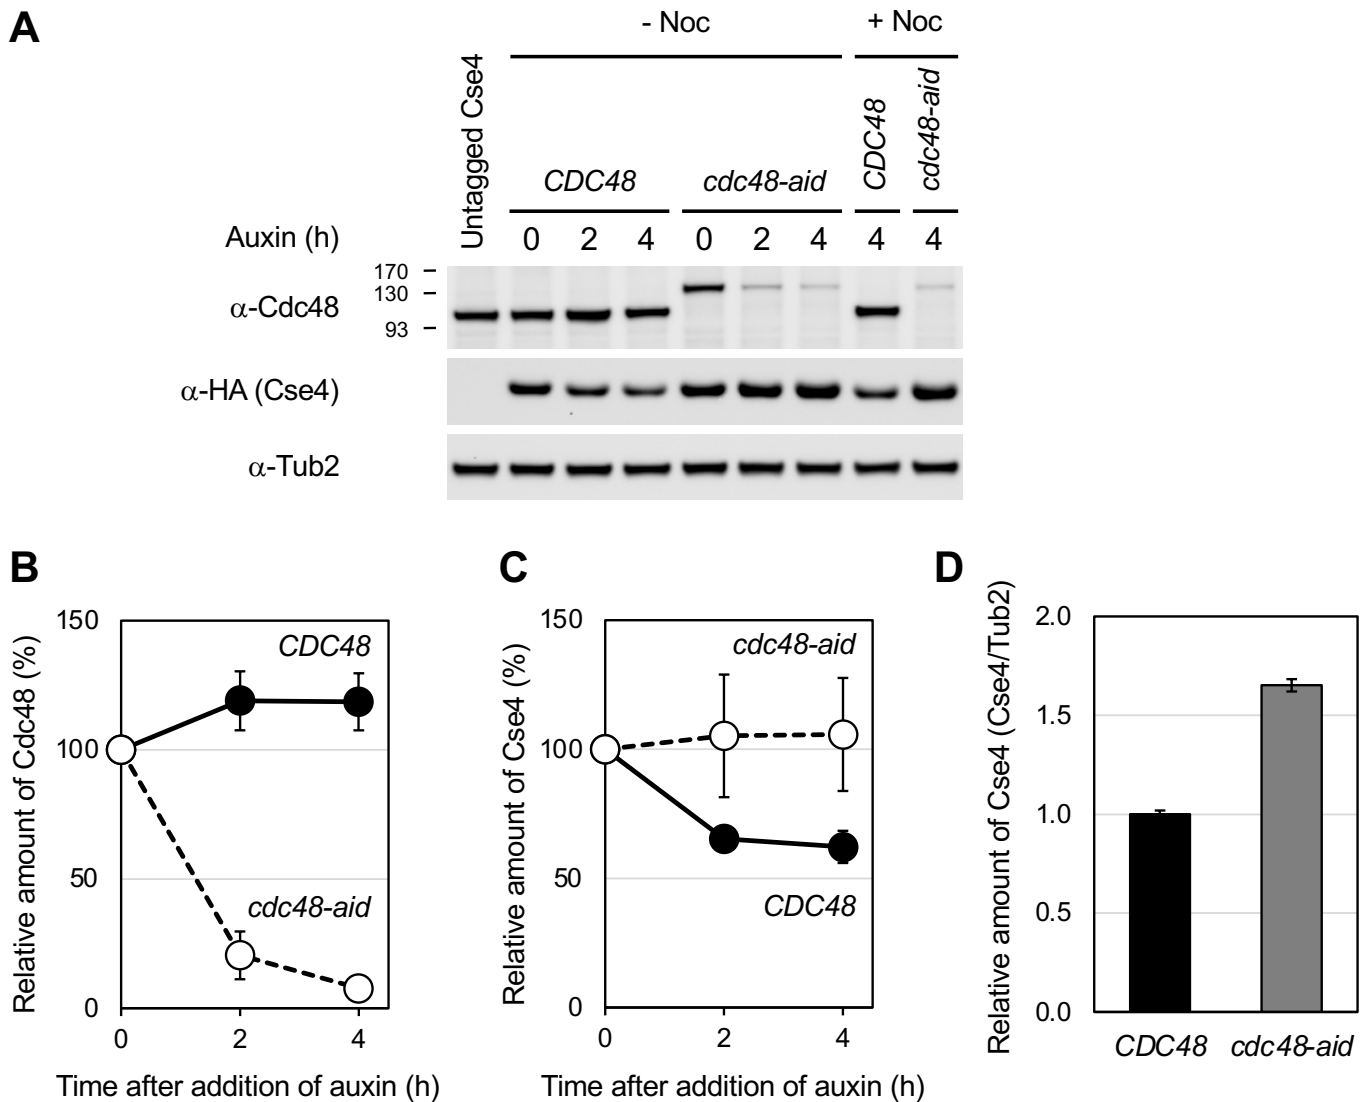

**Supplementary Figure S10.** Levels of Cse4 are increased by inactivation of Cdc48. (A) Auxin treatment leads to efficient depletion of Cdc48 in the *cdc48-aid* strain. *CDC48* (control, YMB11428) and *cdc48-aid* (YMB11429) cells were grown in YPD to logarithmic phase at 25°C, then treated with auxin at the indicated time point. For M phase arrested cells, nocodazole (Noc) was added to the media after 2 hours auxin treatment. The levels of Cdc48, Cse4, and Tub2 were monitored by immunoblotting with anti-Cdc48, anti-HA, and anti-Tub2 antibodies, respectively. (B) The level of Cdc48 was greatly reduced in the *cdc48-aid* strain after auxin treatment (-Noc). (C) The level of Cse4 was maintained in the *cdc48-aid* strain after auxin treatment (-Noc). (D) The level of Cse4 was increased in the *cdc48-aid* strain after auxin and nocodazole treatments when compared to control *CDC48*.

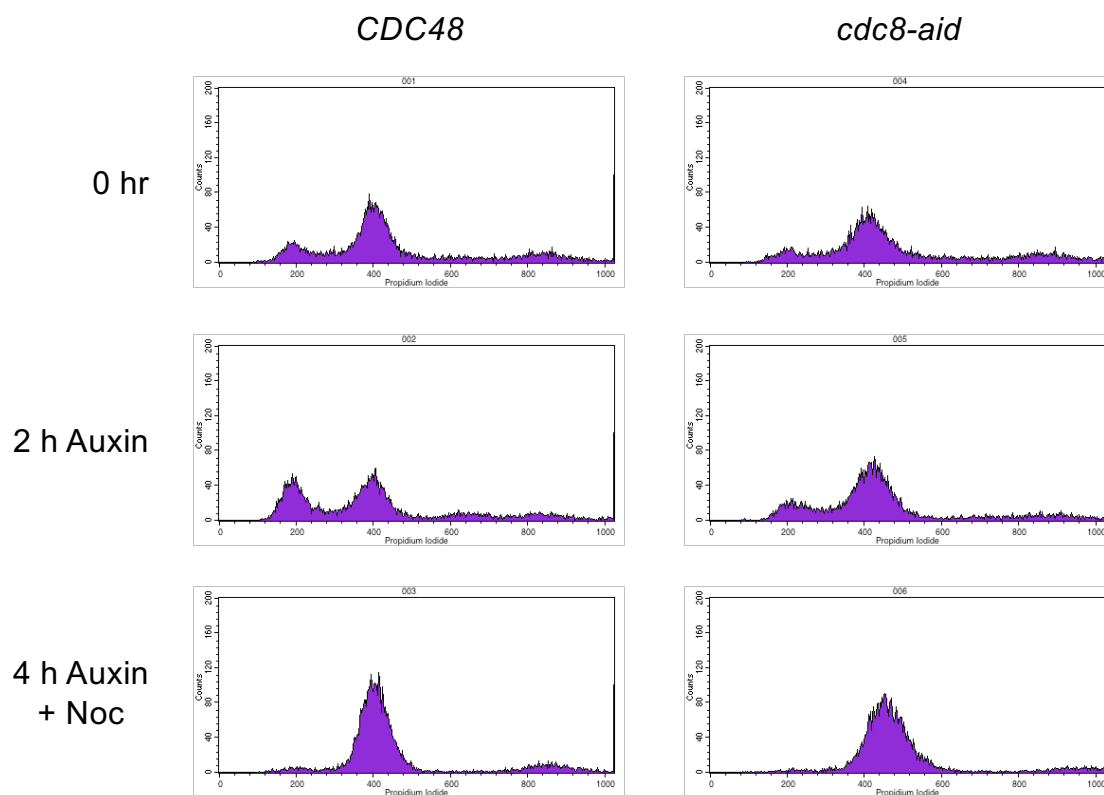

**Supplementary Figure S11.** FACS profiles for strains used in Figure 3B and Supplemental Figure S10. Untreated or nocodazole-treated cells were processed by flow cytometry.

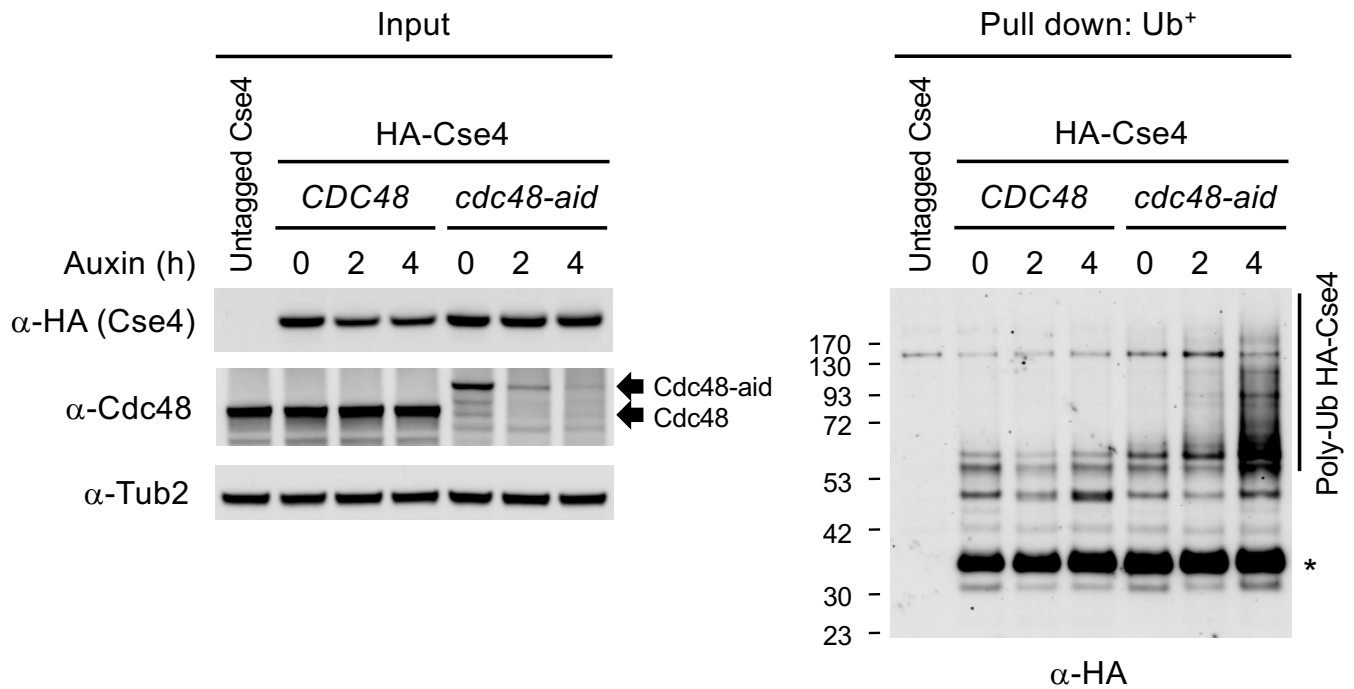

**Supplementary Figure S12.** Auxin-mediated depletion of Cdc48 contributes to accumulation of polyubiquitinated Cse4. Biological repeats for the Ub pull-down assay shown in Figure 3B. Ub pull-down assay was performed using protein extracts from *CDC48* (control, YMB11428) and *cdc48-aid* (YMB11429) strains, grown in YPD to logarithmic phase at 25°C and treated with auxin at the indicated time point. Input and ubiquitin pull down samples were analyzed using anti-HA (Cse4), anti-Cdc48, and anti-Tub2 antibodies. Untagged Cse4 was used as a negative control. Asterisk shows nonmodified Cse4.

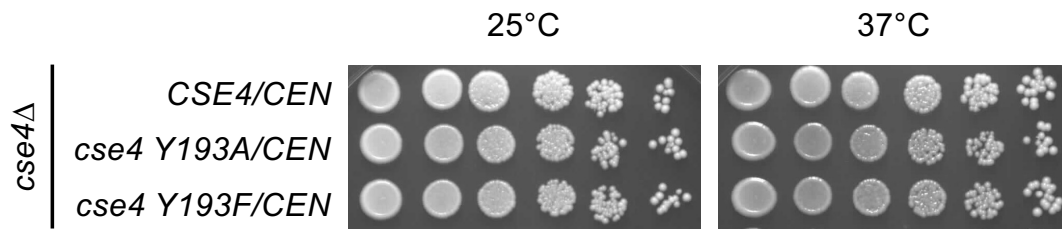

**Supplementary Figure S13.** Both *cse4 Y193A/F* alleles complement *cse4*Δ strain and do not show temperature sensitivity. Cells were spotted in five-fold serial dilutions on YPD plates and incubated at 25°C or 37°C for 3 days. Isogenic yeast strains are *CSE4* (YMB9470), *cse4 Y193A* (YMB9887), and *cse4 Y193F* (YMB9888).

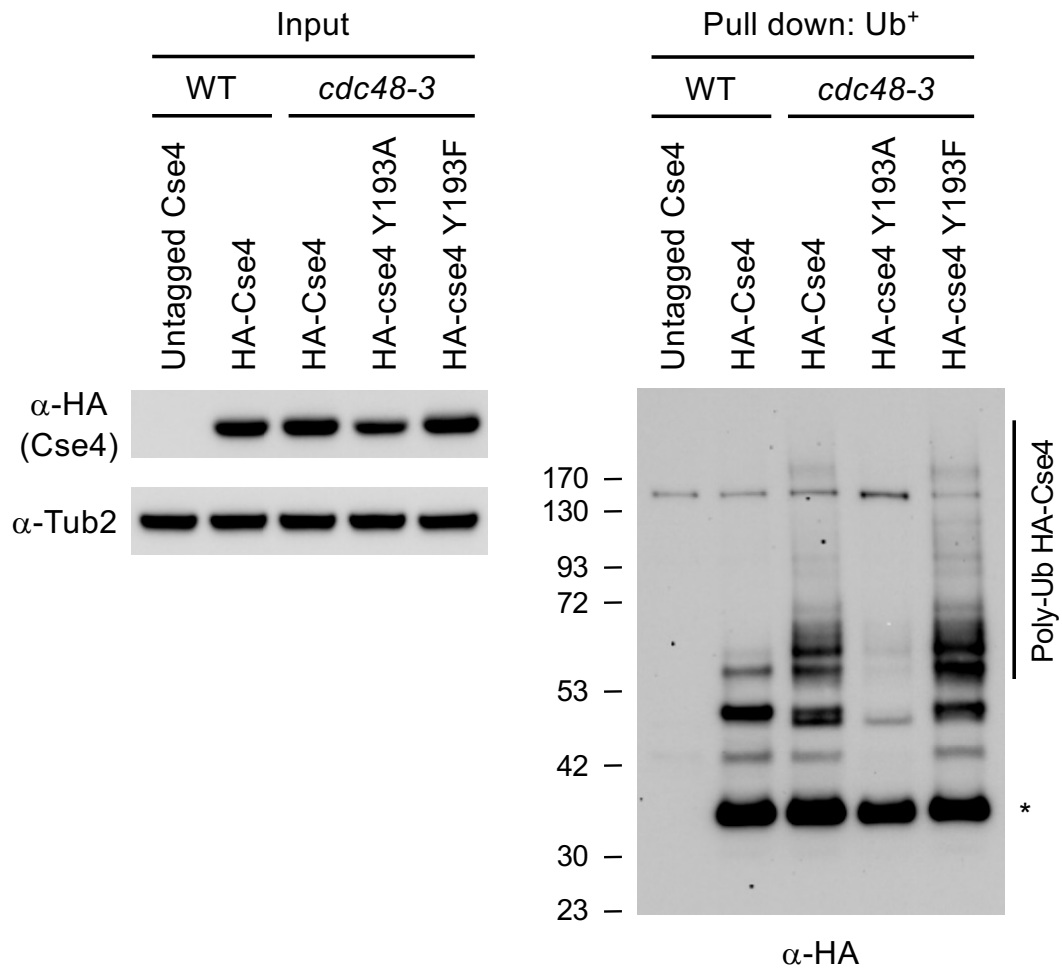

**Supplementary Figure S14.** Endogenous Cse4 Y193A exhibits reduced Cse4 polyubiquitination. Biological repeats shown in Figure 4E. Asterisk shows nonmodified Cse4.

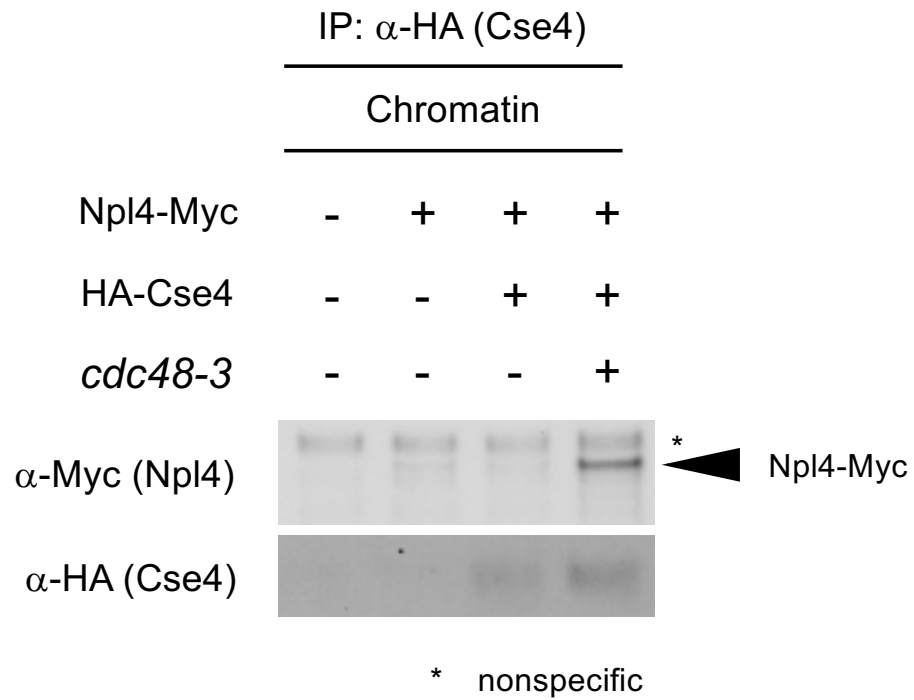

**Supplementary Figure S15.** Npl4 interacts with chromatin-bound Cse4. Biological repeats shown in Figure 5C.

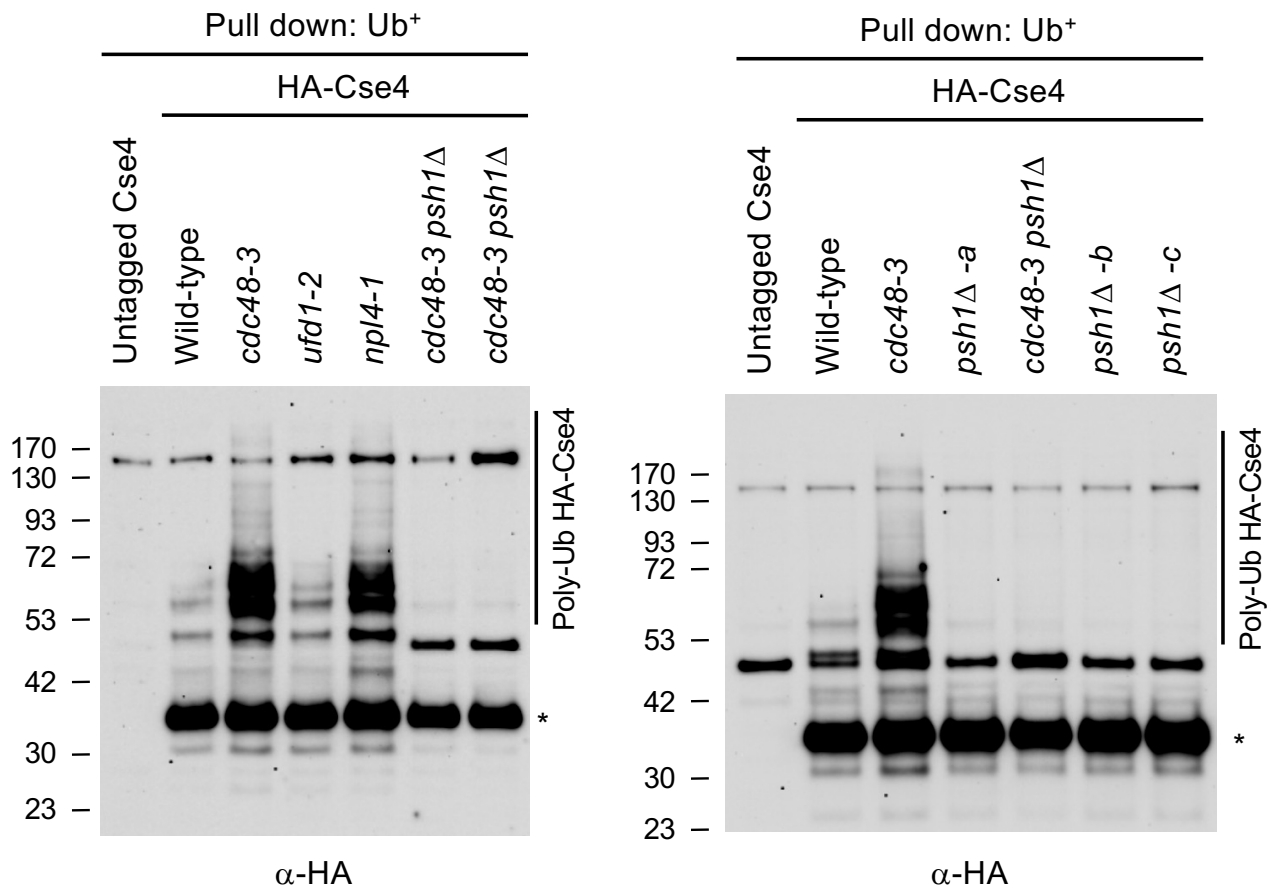

**Supplementary Figure S16.** Psh1 contributes to polyubiquitination of endogenous Cse4 in *cdc48-3* strain. Biological repeats for the Ub pull-down assay shown in Figure 6. Asterisk shows nonmodified Cse4.

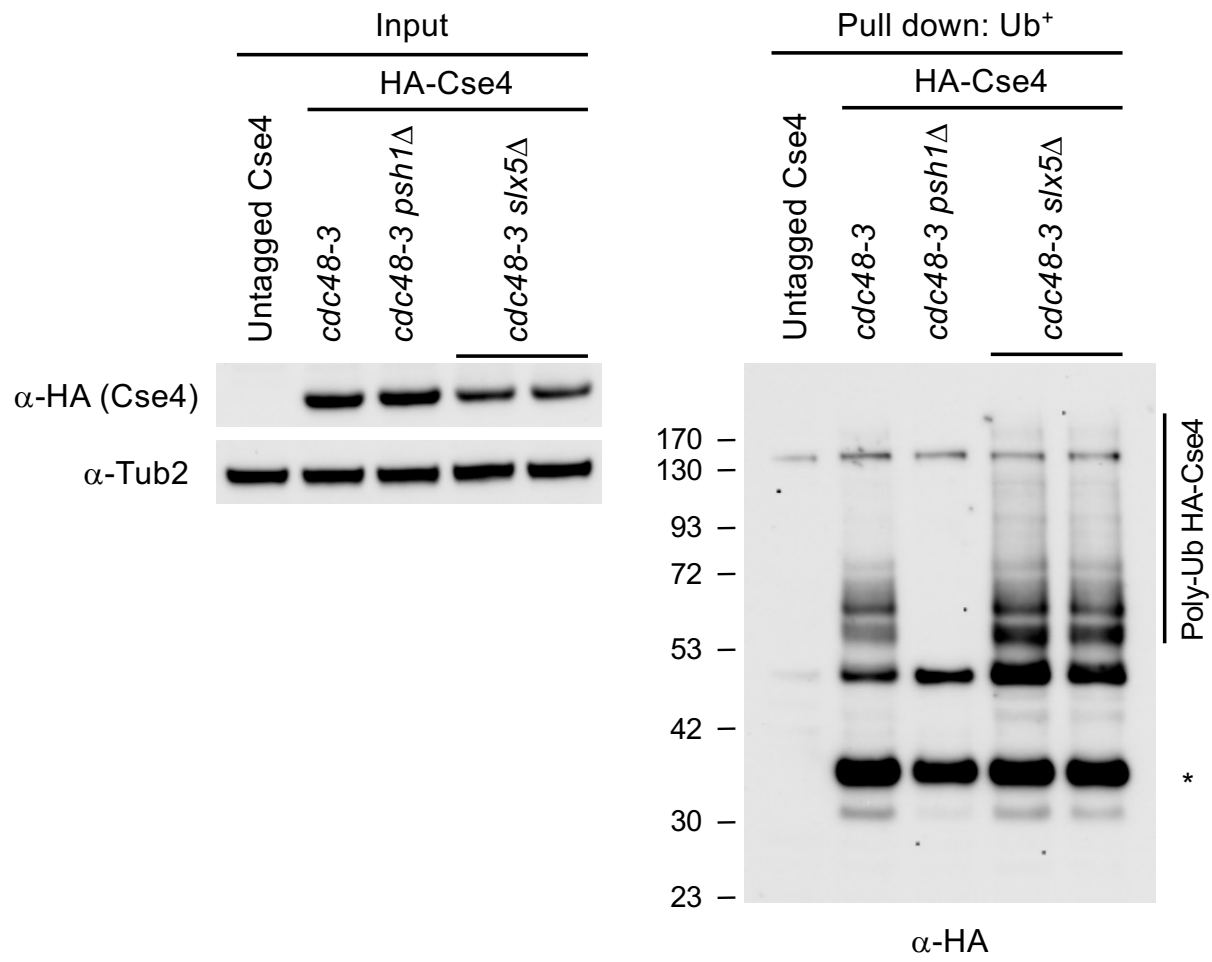

**Supplementary Figure S17.** Higher levels of endogenous Cse4 polyubiquitination in *cdc48-3* are not reduced by deletion of *SLX5*. Ub pull-down assay was performed using protein extracts from logarithmically growing cells in YPD at 25°C. Input and ubiquitin pull down samples were analyzed using anti-HA (Cse4) and anti-Tub2 antibodies. Untagged Cse4 was used as a negative control. Asterisk shows nonmodified Cse4.



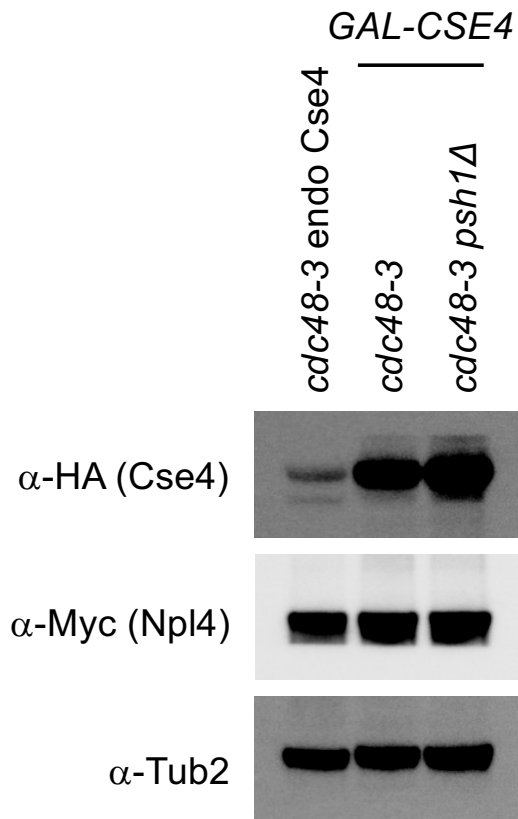

**Supplementary Figure S18.** Deletion of *PSH1* does not affect levels of Npl4-Myc. Cells were grown in sucrose/galactose (2% final concentration each) media for 3-3.5 hours to induce expression of *HA-CSE4* under *GAL* promoter. The levels of Cse4, Npl4, and Tub2 were monitored by Western blot analysis with anti-HA, anti-Myc, and anti-Tub2 antibodies, respectively.

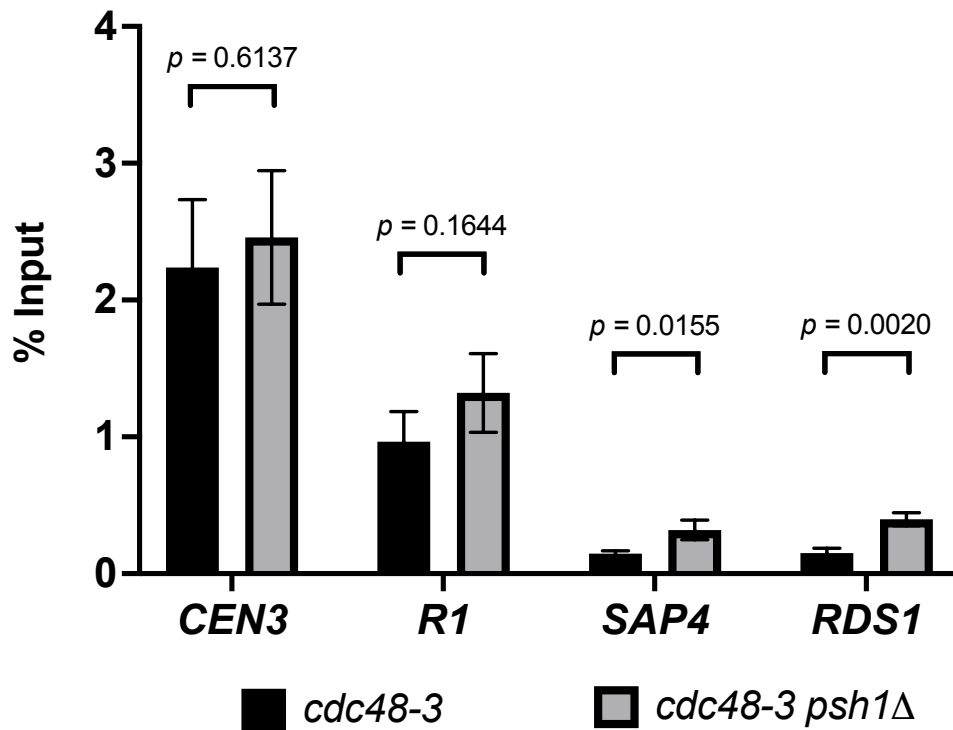

**Supplementary Figure S19.** Increased mislocalization of Cse4 at the promoters of *SAP4* and *RDS1* in a *cdc48-3 psh1Δ* strain, compared to a *cdc48-3* strain. ChIP-qPCR was performed as described in Figure 7D. Statistical significance was assessed by unpaired *t*-test. Error bars represent standard deviation of the mean of three independent experiments.

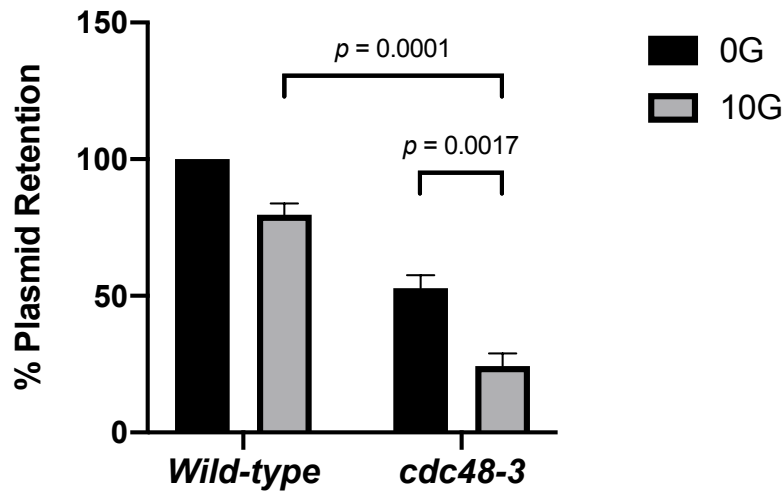

**Supplementary Figure S20.** *cdc48-3* strain exhibits CIN. Wild-type and *cdc48-3* strains containing *CEN* plasmid (pRS416 *URA3*) were grown selectively in SC-Ura plus glucose (2%) medium (SD-Ura) as 0 generation (0G). Equal  $OD_{600}$  of each strain were inoculated in SD complete medium and allowed to grow for 10 generations without selection (10G). Equal  $OD_{600}$  of cells from 0G and 10G were plated on SD-Ura and SD complete medium. Colony number of SD-Ura/SD complete is calculated as the rate of plasmid retention. The percentage of plasmid retention in wild-type cells at 0G is set to 100%. Error bars represent the standard deviation of three replicates. Statistical significance was assessed by unpaired *t*-test.
